# Supplementary material for: Initial therapy affects duration of diarrhoea in critically ill patients with Clostridioides difficile infection (CDI)
Source: Springer Nature journal article supplement (doi:10.1186/s13054-019-2648-6), 2019-12-01
Supplement: MOESM1 [file 17486928]

## Supporting information

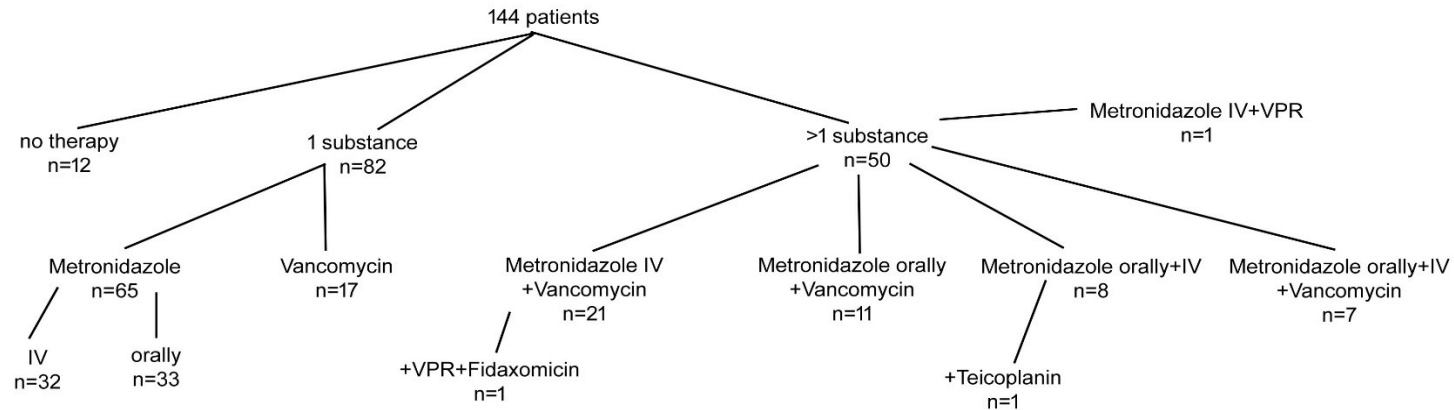

**Figure S1:** CDI specific therapy in all ICU patients with CDI 2010-2015. Legend: Abbreviations: IV: intravenously, VPR: Vancomycin per rectum

**Table S1:** Treatment strategy according to CDI severity during first 48 h after diagnosis of CDI.

| <b>A: Medication during first 48 h after diagnosis</b>            | <b>All patients with CDI<br/>n=132</b> | <b>Severe CDI<br/>n=80</b> | <b>Non-severe CDI<br/>n=52</b> |
|-------------------------------------------------------------------|----------------------------------------|----------------------------|--------------------------------|
| Initial Combination therapy                                       | 12 (9.1)                               | 7 (8.8)                    | 5 (9.6)                        |
| Initial metronidazole IV single                                   | 49 (37.1)                              | 30 (37.5)                  | 19 (36.5)                      |
| Initial vancomycin orally single                                  | 24 (18.2)                              | 16 (20)                    | 8 (15.4)                       |
| Initial metronidazole orally single                               | 47 (35.6)                              | 27 (33.8)                  | 20 (38.5)                      |
| <b>B: Medication during first 48h after diagnosis (2014-2015)</b> | <b>All patients with CDI<br/>n=54</b>  | <b>Severe CDI<br/>n=34</b> | <b>Non-severe CDI<br/>n=20</b> |
| Initial Combination therapy                                       | 9 (15.5)                               | 5 (13.5)                   | 4 (20)                         |
| Initial metronidazole IV single                                   | 11 (19)                                | 7 (18.9)                   | 4 (20)                         |
| Initial vancomycin orally single                                  | 13 (22.4)                              | 9 (24.3)                   | 4 (20)                         |
| Initial metronidazole orally single                               | 21 (36.2)                              | 13 (35.1)                  | 8 (40)                         |

Legend: A: before 2014, B: 2014-October 2015.

**Table S2:** Characteristics of all treated patients with CDI.

| Parameters                         | All patients with CDI<br>n=132 |                  | 28-day-survivors<br>n=96 |                  | 28-day-non-survivors<br>n=36 |                  | p             |                   |
|------------------------------------|--------------------------------|------------------|--------------------------|------------------|------------------------------|------------------|---------------|-------------------|
|                                    | admission                      | diagnosis        | admission                | diagnosis        | admission                    | diagnosis        | admission     | diagnosis         |
| <b>Laboratory characteristics</b>  |                                |                  |                          |                  |                              |                  |               |                   |
| Thrombocytes (Median, IQR25-75)    | 197 (116-282)                  | 249 (128-385)    | 198 (128-292)            | 262 (164-394)    | 172 (87-212)                 | 143 (71-318)     | <b>0.007*</b> | <b>0.006*</b>     |
| Leukocytes (Median, IQR25-75)      | 11.5 (7-17)                    | 12.2 (7.9-17,7)  | 11.5 (7.9-17)            | 12.5 (9.1-17,9)  | 11.5 (3.8-17,5)              | 12.2 (3.7-17.6)  | 0.655         | 0.482             |
| Hemoglobin (Median, IQR25-75)      | 9.5 (8.7-10.9)                 | 8.8 (8-9.9)      | 9.8 (8.9-11)             | 8.8 (8-9.9)      | 9.7 (9-11.6)                 | 9.3 (8-10.5)     | 0.489         | 0.206             |
| BUN (Median, IQR25-75)             | 23 (14-37.5)                   | 27 (17-40)       | 22 (13-38)               | 26 (17-39)       | 29 (21-44)                   | 32 (23-41)       | <b>0.002*</b> | <b>0.049*</b>     |
| Creatinine (Median, IQR25-75)      | 1.3 (0.9-2.1)                  | 1.1 (0.8-2)      | 1.3 (0.9-2.1)            | 1.1 (0.7-2)      | 1.6 (1.1-2.6)                | 1.3 (0.9-2.4)    | <b>0.032*</b> | 0.067             |
| CRP (Median, IQR25-75)             | 93 (24-150)                    | 108 (52-157)     | 82 (20-159)              | 108 (58-149)     | 104 (63-148)                 | 104 (44-163)     | 0.051         | 0.894             |
| Lactate (Median, IQR25-75)         | 1.2 (0.8-2)                    | 1 (0.7-1.4)      | 1.2 (0.9-1.8)            | 0.9 (0.7-1.2)    | 1.4 (0.8-2.5)                | 1.3 (0.8-1.9)    | 0.450         | <b>0.008*</b>     |
| Albumin (Median, IQR25-75)         | 19 (17-23)                     | 17 (15-22)       | 19 (17-23)               | 18 (15-22)       | 17 (16-19)                   | 17 (15-22)       | 0.127         | 0.844             |
| Bilirubin (Median, IQR25-75)       | 0.6 (0.3-1)                    | 0.4 (0.2-0.7)    | 0.6 (0.3-0.9)            | 0.4 (0.2-0.6)    | 0.9 (0.5-1.9)                | 0.7 (0.4-1.6)    | <b>0.001*</b> | <b>&lt;0.001*</b> |
| <b>Clinical characteristics</b>    |                                |                  |                          |                  |                              |                  |               |                   |
| Urine vol. (l), (Median, IQR25-75) | 1350 (658-2300)                | 1665 (710-2488)  | 1515 (748-2501)          | 1910 (1317-2862) | 915 (460-1535)               | 950 (173-1585)   | <b>0.006*</b> | <b>&lt;0.001*</b> |
| SAPS (Median, IQR25-75)            | 41 (33-50)                     | 36.5 (29-45)     | 38.5 (31-48)             | 34 (28-43)       | 44.5 (38-55)                 | 43 (34-55)       | <b>0.003*</b> | <b>0.001*</b>     |
| TISS28 (Median, IQR25-75)          | 10 (9-17)                      | 10 (5-14)        | 14 (9-19)                | 10 (5-14)        | 10 (8-14)                    | 10 (5-13)        | 0.233         | 0.907             |
| SOFA Score (Median, IQR25-75)      | 6 (4-9)                        | 4 (2-6.3)        | 6.5 (4-9)                | 4 (2-6)          | 6 (4-9)                      | 6 (4-9)          | 0.472         | <b>&lt;0.001*</b> |
| Temp. (C°) (Median, IQR25-75)      | 36.7 (36-37.3)                 | 37.1 (36.7-37.6) | 36.7 (36.1-37.3)         | 37.2 (36.7-37.6) | 36.7 (35.8-37.3)             | 37.1 (36.4-37.7) | 0.698         | 0.442             |

| Therapy/Treatment           |            |            |           |           |           |           |       |               |
|-----------------------------|------------|------------|-----------|-----------|-----------|-----------|-------|---------------|
| Parenteral nutrition, n (%) | 23 (17.4)  | 27 (20.5)  | 15 (15.6) | 15 (15.6) | 8 (22.2)  | 12 (33.3) | 0.374 | <b>0.025*</b> |
| Enteral nutrition, n (%)    | 105 (79.5) | 125 (94.7) | 79 (82.3) | 93 (96.9) | 26 (72.2) | 32 (88.9) | 0.201 | 0.068         |

Legend: Univariate regression analysis of risk factors of 28-day survivors vs. 28-day-nonsurvivors. Abbreviations: BUN: blood urea nitrogen, CRP: C-reactive protein, vol.: volume, MAP: mean arterial pressure

**Table S3:** Patients` characteristics of the study population with CDI stratified according to diarrhoea > 5 days.

| Parameter                                | All patients<br>n=132 | Diarrhoea < 5 days<br>n=66 | Diarrhoea > 5 days<br>n=66 | p     |
|------------------------------------------|-----------------------|----------------------------|----------------------------|-------|
| Severe CDI, n (%)                        | 87 (65.9)             | 38 (57.6)                  | 49 (74.2)                  | 0.098 |
| Male, n (%)                              | 94 (71.2)             | 45 (68.2)                  | 49 (74.2)                  | 0.701 |
| Recurrent CDI, n (%)                     | 25 (18.9)             | 12 (18.2)                  | 13 (19.7)                  | 0.505 |
| Principal diagnosis sepsis, n (%)        | 40 (30.3)             | 24 (36.4)                  | 16 (24.2)                  | 0.130 |
| Neutropenia, n (%)                       | 8 (6.1)               | 4 (6.1)                    | 4 (6.1)                    | 1.000 |
| <b>Treatment</b>                         |                       |                            |                            |       |
| Parenteral nutrition on diagnosis, n (%) | 27 (20.5)             | 15 (22.7)                  | 12 (18.2)                  | 0.281 |
| Enteral nutrition on diagnosis, n (%)    | 125 (94.7)            | 62 (93.9)                  | 63 (95.5)                  | 0.698 |
| Proton pump inhibitors, n (%)            | 126 (95.5)            | 63 (95.5)                  | 63 (95.5)                  | 1.000 |
| Immunosuppressants, n (%)                | 33 (25)               | 15 (22.7)                  | 18 (27.3)                  | 0.546 |

**Table S4:** Patients` characteristics of the study population with CDI stratified according to initial CDI therapy (first 48 h)

| <b>Parameter</b>                                               | <b>All patients with CDI<br/>n=132</b> | <b>Metronidazole IV<br/>n=49</b> | <b>Other CDI therapy<br/>n=83</b> | <b>p</b> |
|----------------------------------------------------------------|----------------------------------------|----------------------------------|-----------------------------------|----------|
| Number of patients, n (%)                                      | 132 (100)                              | 49 (37.1)                        | 83 (62.9)                         |          |
| Age in years (Median, IQR25-75)                                | 70 (59-77)                             | 67 (58-74)                       | 72 (60-78)                        | 0.093    |
| Male, n (%)                                                    | 94 (71.2)                              | 31 (63.3)                        | 63 (75.9)                         | 0.121    |
| Charlson Comorbidity Index (Median, IQR25-75)                  | 5 (3-7)                                | 4 (2-7)                          | 5 (3-7)                           | 0.136    |
| SAPS on diagnosis (Median, IQR25-75)                           | 37 (29-45)                             | 40 (30-46)                       | 34 (29-45)                        | 0.167    |
| SOFA Score on admission (Median, IQR25-75)                     | 6 (4-9)                                | 6 (5-10)                         | 6 (4-8)                           | 0.105    |
| SOFA Score on diagnosis (Median, IQR25-75)                     | 4 (2-6)                                | 5 (3-6)                          | 4 (2-7)                           | 0.350    |
| <b>Diagnoses</b>                                               |                                        |                                  |                                   |          |
| Principal diagnosis <i>C. difficile</i> infection (CDI), n (%) | 5 (3.8)                                | 2 (4.1)                          | 3 (3.6)                           | 0.892    |
| Principal diagnosis Sepsis, n (%)                              | 40 (30.3)                              | 17 (34.7)                        | 23 (27.7)                         | 0.399    |
| Principal diagnosis Postoperative, n (%)                       | 39 (29.5)                              | 17 (34.7)                        | 22 (26.5)                         | 0.319    |
| Neutropenia, n (%)                                             | 8 (6.1)                                | 4 (8.2)                          | 4 (4.8)                           | 0.437    |
| Severe CDI, n (%)                                              | 87 (65.9)                              | 33 (67.3)                        | 54 (65.1)                         | 0.789    |
| <b>Treatment</b>                                               |                                        |                                  |                                   |          |
| Mechanical ventilation overall, n (%)                          | 96 (72.7)                              | 37 (75.5)                        | 59 (71.1)                         | 0.488    |
| Vasopressor therapy on admission, n (%)                        | 104 (78.8)                             | 40 (81.6)                        | 64 (77.1)                         | 0.539    |
| Renal replacement therapy (RRT), n (%)                         | 32 (24.2)                              | 16 (32.7)                        | 16 (19.3)                         | 0.083    |

|                                          |            |           |           |       |
|------------------------------------------|------------|-----------|-----------|-------|
| Parenteral nutrition on diagnosis, n (%) | 27 (20.5)  | 12 (24.5) | 15 (18.1) | 0.377 |
| Enteral nutrition on diagnosis, n (%)    | 125 (94.7) | 47 (95.9) | 78 (94)   | 0.630 |
| <b>Outcome</b>                           |            |           |           |       |
| Death 28d, n (%)                         | 36 (27.3)  | 17 (34.7) | 19 (22.9) | 0.141 |
| Death 90d, n (%)                         | 42 (31.8)  | 20 (40.8) | 22 (26.5) | 0.088 |
| <b>Medication</b>                        |            |           |           |       |
| Immunosuppressants, n (%)                | 33 (25)    | 11 (22.4) | 22 (26.5) | 0.603 |
| Steroids > 10mg/day, n (%)               | 28 (21.2)  | 11 (22.4) | 17 (20.5) | 0.789 |
